# Supplementary material for: Identification of Hub Genes Correlated With Poor Prognosis for Patients With Uterine Corpus Endometrial Carcinoma by Integrated Bioinformatics Analysis and Experimental Validation
Source: Front Oncol. 2021 Nov 19;11:766947. doi: 10.3389/fonc.2021.766947 (PMC8639584; doi:10.3389/fonc.2021.766947)
Supplement: Supplementary file 2 [file Table_2.xls]

## Sheet: Table_S2_kegg
ID	Description	GeneRatio	BgRatio	pvalue	p.adjust	qvalue	geneID	Count
hsa04110	Cell cycle	11/95	124/8108	1.81e-07	3.76e-05	3.69e-05	8318/991/9133/890/983/4085/7272/1111/891/4174/9232	11
hsa04114	Oocyte meiosis	10/95	129/8108	2.36e-06	0.000244939	0.000240476	991/9133/983/4085/51806/6790/891/9232/3708/5241	10
hsa04218	Cellular senescence	10/95	156/8108	1.29e-05	0.00089743	0.00088108	2305/4605/9133/890/983/51806/1111/891/776/3708	10
hsa04061	Viral protein interaction with cytokine and cytokine receptor	8/95	100/8108	2.03e-05	0.00105485	0.00103563	3627/10563/6373/4283/6362/6355/9547/1524	8
hsa03320	PPAR signaling pathway	7/95	76/8108	2.74e-05	0.00114184	0.00112103	4312/9415/9370/5105/2167/3158/5346	7
hsa04914	Progesterone-mediated oocyte maturation	7/95	100/8108	0.000159976	0.00554584	0.00544481	9133/890/983/4085/6790/891/5241	7
hsa04115	p53 signaling pathway	5/95	73/8108	0.00159154	0.0464884	0.0456414	9133/6241/983/1111/891	5
hsa04062	Chemokine signaling pathway	8/95	192/8108	0.00178802	0.0464884	0.0456414	3627/10563/6373/4283/6362/6355/9547/1524	8
hsa04060	Cytokine-cytokine receptor interaction	10/95	295/8108	0.002287	0.0528552	0.0518922	3627/10563/6373/4283/6362/7850/6355/652/9547/1524	10
hsa05166	Human T-cell leukemia virus 1 infection	8/95	219/8108	0.00403495	0.083927	0.0823979	991/9133/890/4085/7850/1111/9232/3117	8
hsa04657	IL-17 signaling pathway	5/95	94/8108	0.00479812	0.0907282	0.0890752	4312/6280/6279/6278/3627	5
hsa05170	Human immunodeficiency virus 1 infection	7/95	212/8108	0.011982	0.207687	0.203904	9133/9582/983/51806/1111/891/3708	7
hsa04924	Renin secretion	3/95	69/8108	0.0468808	0.696515	0.683826	51806/776/3708	3
hsa05031	Amphetamine addiction	3/95	69/8108	0.0468808	0.696515	0.683826	51806/776/4129	3
hsa00982	Drug metabolism - cytochrome P450	3/95	72/8108	0.0520597	0.697652	0.684942	4129/125/2330	3
hsa00350	Tyrosine metabolism	2/95	36/8108	0.0661785	0.697652	0.684942	4129/125	2
hsa04728	Dopaminergic synapse	4/95	132/8108	0.0689307	0.697652	0.684942	51806/776/4129/3708	4
hsa04270	Vascular smooth muscle contraction	4/95	133/8108	0.0704572	0.697652	0.684942	51806/776/3708/4629	4
hsa05330	Allograft rejection	2/95	38/8108	0.0727564	0.697652	0.684942	3002/3117	2
hsa04210	Apoptosis	4/95	136/8108	0.0751408	0.697652	0.684942	597/332/3002/3708	4
hsa04915	Estrogen signaling pathway	4/95	138/8108	0.0783492	0.697652	0.684942	3868/51806/3708/5241	4
hsa00260	Glycine, serine and threonine metabolism	2/95	40/8108	0.0795357	0.697652	0.684942	4129/2593	2
hsa00380	Tryptophan metabolism	2/95	42/8108	0.0865037	0.697652	0.684942	3620/4129	2
hsa05332	Graft-versus-host disease	2/95	42/8108	0.0865037	0.697652	0.684942	3002/3117	2
hsa04940	Type I diabetes mellitus	2/95	43/8108	0.0900547	0.697652	0.684942	3002/3117	2
hsa04912	GnRH signaling pathway	3/95	93/8108	0.0953705	0.697652	0.684942	51806/776/3708	3
hsa04970	Salivary secretion	3/95	93/8108	0.0953705	0.697652	0.684942	820/51806/3708	3
hsa04930	Type II diabetes mellitus	2/95	46/8108	0.100958	0.697652	0.684942	776/9370	2
hsa05150	Staphylococcus aureus infection	3/95	96/8108	0.102478	0.697652	0.684942	3868/820/3117	3
hsa00620	Pyruvate metabolism	2/95	47/8108	0.10467	0.697652	0.684942	125/5105	2
hsa04713	Circadian entrainment	3/95	97/8108	0.104893	0.697652	0.684942	51806/776/3708	3
hsa04925	Aldosterone synthesis and secretion	3/95	98/8108	0.107331	0.697652	0.684942	51806/776/3708	3
hsa00072	Synthesis and degradation of ketone bodies	1/95	10/8108	0.111238	0.701137	0.688363	3158	1
hsa05144	Malaria	2/95	50/8108	0.116025	0.707275	0.694389	1311/2532	2
hsa00330	Arginine and proline metabolism	2/95	51/8108	0.119878	0.707275	0.694389	4129/2593	2
hsa04620	Toll-like receptor signaling pathway	3/95	104/8108	0.122413	0.707275	0.694389	3627/6373/4283	3
hsa05320	Autoimmune thyroid disease	2/95	53/8108	0.127677	0.712846	0.699859	3002/3117	2
hsa04922	Glucagon signaling pathway	3/95	107/8108	0.130232	0.712846	0.699859	51806/3708/5105	3
hsa04340	Hedgehog signaling pathway	2/95	56/8108	0.139591	0.731723	0.718392	4036/57758	2
hsa04923	Regulation of lipolysis in adipocytes	2/95	57/8108	0.143616	0.731723	0.718392	2167/5346	2
hsa04726	Serotonergic synapse	3/95	115/8108	0.151904	0.731723	0.718392	776/4129/3708	3
hsa04152	AMPK signaling pathway	3/95	120/8108	0.165998	0.731723	0.718392	890/9370/5105	3
hsa00730	Thiamine metabolism	1/95	16/8108	0.172008	0.731723	0.718392	26289	1
hsa04929	GnRH secretion	2/95	64/8108	0.172414	0.731723	0.718392	776/3708	2
hsa04927	Cortisol synthesis and secretion	2/95	65/8108	0.176605	0.731723	0.718392	776/3708	2
hsa05321	Inflammatory bowel disease	2/95	65/8108	0.176605	0.731723	0.718392	3117/2625	2
hsa00360	Phenylalanine metabolism	1/95	17/8108	0.181729	0.731723	0.718392	4129	1
hsa00910	Nitrogen metabolism	1/95	17/8108	0.181729	0.731723	0.718392	771	1
hsa00010	Glycolysis / Gluconeogenesis	2/95	67/8108	0.185034	0.731723	0.718392	125/5105	2
hsa04720	Long-term potentiation	2/95	67/8108	0.185034	0.731723	0.718392	51806/3708	2
hsa05221	Acute myeloid leukemia	2/95	67/8108	0.185034	0.731723	0.718392	597/890	2
hsa05202	Transcriptional misregulation in cancer	4/95	192/8108	0.18775	0.731723	0.718392	597/890/7850/3002	4
hsa04920	Adipocytokine signaling pathway	2/95	69/8108	0.193522	0.731723	0.718392	9370/5105	2
hsa05230	Central carbon metabolism in cancer	2/95	70/8108	0.197785	0.731723	0.718392	8140/5163	2
hsa04068	FoxO signaling pathway	3/95	131/8108	0.198263	0.731723	0.718392	9133/891/5105	3
hsa01524	Platinum drug resistance	2/95	73/8108	0.210641	0.731723	0.718392	7153/332	2
hsa04910	Insulin signaling pathway	3/95	137/8108	0.216469	0.731723	0.718392	51806/5105/5507	3
hsa05203	Viral carcinogenesis	4/95	204/8108	0.216803	0.731723	0.718392	991/890/983/1111	4
hsa04918	Thyroid hormone synthesis	2/95	75/8108	0.21926	0.731723	0.718392	3708/4036	2
hsa04371	Apelin signaling pathway	3/95	138/8108	0.219538	0.731723	0.718392	51806/3708/5346	3
hsa05418	Fluid shear stress and atherosclerosis	3/95	139/8108	0.222617	0.731723	0.718392	7850/51806/652	3
hsa04971	Gastric acid secretion	2/95	76/8108	0.223581	0.731723	0.718392	51806/3708	2
hsa04120	Ubiquitin mediated proteolysis	3/95	140/8108	0.225704	0.731723	0.718392	991/11065/27338	3
hsa00340	Histidine metabolism	1/95	22/8108	0.228663	0.731723	0.718392	4129	1
hsa00900	Terpenoid backbone biosynthesis	1/95	22/8108	0.228663	0.731723	0.718392	3158	1
hsa04964	Proximal tubule bicarbonate reclamation	1/95	23/8108	0.237726	0.743898	0.730345	5105	1
hsa00983	Drug metabolism - other enzymes	2/95	80/8108	0.240927	0.743898	0.730345	1941-09-01	2
hsa04723	Retrograde endocannabinoid signaling	3/95	148/8108	0.250687	0.743898	0.730345	2568/776/3708	3
hsa00592	alpha-Linolenic acid metabolism	1/95	25/8108	0.255535	0.743898	0.730345	9415	1
hsa04145	Phagosome	3/95	152/8108	0.263338	0.743898	0.730345	8685/3117/1311	3
hsa04950	Maturity onset diabetes of the young	1/95	26/8108	0.264285	0.743898	0.730345	5080	1
hsa04921	Oxytocin signaling pathway	3/95	154/8108	0.269695	0.743898	0.730345	51806/776/3708	3
hsa01040	Biosynthesis of unsaturated fatty acids	1/95	27/8108	0.272933	0.743898	0.730345	9415	1
hsa04512	ECM-receptor interaction	2/95	88/8108	0.275772	0.743898	0.730345	1311/1101	2
hsa04540	Gap junction	2/95	88/8108	0.275772	0.743898	0.730345	983/3708	2
hsa01240	Biosynthesis of cofactors	3/95	156/8108	0.27607	0.743898	0.730345	23475/3620/26289	3
hsa04727	GABAergic synapse	2/95	89/8108	0.28013	0.743898	0.730345	2568/776	2
hsa00650	Butanoate metabolism	1/95	28/8108	0.28148	0.743898	0.730345	3158	1
hsa04744	Phototransduction	1/95	29/8108	0.289928	0.743898	0.730345	51806	1
hsa04658	Th1 and Th2 cell differentiation	2/95	92/8108	0.29319	0.743898	0.730345	3117/2625	2
hsa05323	Rheumatoid arthritis	2/95	93/8108	0.297538	0.743898	0.730345	4312/3117	2
hsa00020	Citrate cycle (TCA cycle)	1/95	30/8108	0.298278	0.743898	0.730345	5105	1
hsa04710	Circadian rhythm	1/95	31/8108	0.30653	0.743898	0.730345	1408	1
hsa05310	Asthma	1/95	31/8108	0.30653	0.743898	0.730345	3117	1
hsa04020	Calcium signaling pathway	4/95	240/8108	0.309797	0.743898	0.730345	51806/776/3708/2066	4
hsa04022	cGMP-PKG signaling pathway	3/95	167/8108	0.311369	0.743898	0.730345	51806/776/3708	3
hsa04215	Apoptosis - multiple species	1/95	32/8108	0.314687	0.743898	0.730345	332	1
hsa04070	Phosphatidylinositol signaling system	2/95	97/8108	0.314886	0.743898	0.730345	51806/3708	2
hsa04750	Inflammatory mediator regulation of TRP channels	2/95	98/8108	0.31921	0.743898	0.730345	51806/3708	2
hsa04640	Hematopoietic cell lineage	2/95	99/8108	0.323528	0.743898	0.730345	7850/3117	2
hsa05164	Influenza A	3/95	172/8108	0.327485	0.743898	0.730345	3627/3117/64499	3
hsa05012	Parkinson disease	4/95	249/8108	0.333826	0.743898	0.730345	51806/4129/3708/4137	4
hsa00760	Nicotinate and nicotinamide metabolism	1/95	35/8108	0.338591	0.743898	0.730345	23475	1
hsa04974	Protein digestion and absorption	2/95	103/8108	0.340729	0.743898	0.730345	1307/1308	2
hsa04625	C-type lectin receptor signaling pathway	2/95	104/8108	0.34501	0.743898	0.730345	51806/3708	2
hsa03030	DNA replication	1/95	36/8108	0.346374	0.743898	0.730345	4174	1
hsa05152	Tuberculosis	3/95	180/8108	0.353265	0.743898	0.730345	820/51806/3117	3
hsa04928	Parathyroid hormone synthesis, secretion and action	2/95	106/8108	0.353545	0.743898	0.730345	3708/2625	2
hsa05143	African trypanosomiasis	1/95	37/8108	0.354067	0.743898	0.730345	3620	1
hsa04659	Th17 cell differentiation	2/95	107/8108	0.357799	0.744221	0.730662	3117/2625	2
hsa04931	Insulin resistance	2/95	108/8108	0.362042	0.745592	0.732009	5105/5507	2
hsa05033	Nicotine addiction	1/95	40/8108	0.376611	0.767185	0.753208	2568	1
hsa04725	Cholinergic synapse	2/95	113/8108	0.383103	0.767185	0.753208	776/3708	2
hsa05219	Bladder cancer	1/95	41/8108	0.383951	0.767185	0.753208	4312	1
hsa04724	Glutamatergic synapse	2/95	114/8108	0.387281	0.767185	0.753208	776/3708	2
hsa00071	Fatty acid degradation	1/95	43/8108	0.398376	0.78172	0.767478	125	1
hsa04935	Growth hormone synthesis, secretion and action	2/95	119/8108	0.407984	0.793091	0.778642	776/3708	2
hsa02010	ABC transporters	1/95	45/8108	0.412467	0.794277	0.779807	10351	1
hsa05169	Epstein-Barr virus infection	3/95	202/8108	0.423339	0.794277	0.779807	3627/890/3117	3
hsa04973	Carbohydrate digestion and absorption	1/95	47/8108	0.426231	0.794277	0.779807	776	1
hsa00280	Valine, leucine and isoleucine degradation	1/95	48/8108	0.432993	0.794277	0.779807	3158	1
hsa00565	Ether lipid metabolism	1/95	49/8108	0.439676	0.794277	0.779807	7368	1
hsa00600	Sphingolipid metabolism	1/95	49/8108	0.439676	0.794277	0.779807	7368	1
hsa04672	Intestinal immune network for IgA production	1/95	49/8108	0.439676	0.794277	0.779807	3117	1
hsa05030	Cocaine addiction	1/95	49/8108	0.439676	0.794277	0.779807	4129	1
hsa04979	Cholesterol metabolism	1/95	50/8108	0.446282	0.794277	0.779807	4036	1
hsa00230	Purine metabolism	2/95	130/8108	0.45231	0.794277	0.779807	6241/26289	2
hsa04010	MAPK signaling pathway	4/95	294/8108	0.453711	0.794277	0.779807	1844/776/4137/2066	4
hsa05207	Chemical carcinogenesis - receptor activation	3/95	212/8108	0.454418	0.794277	0.779807	332/776/5241	3
hsa05417	Lipid and atherosclerosis	3/95	215/8108	0.463614	0.803597	0.788957	4312/51806/3708	3
hsa05322	Systemic lupus erythematosus	2/95	136/8108	0.475699	0.813332	0.798515	3117/730	2
hsa00240	Pyrimidine metabolism	1/95	56/8108	0.484325	0.813332	0.798515	6241	1
hsa00480	Glutathione metabolism	1/95	57/8108	0.490409	0.813332	0.798515	6241	1
hsa01212	Fatty acid metabolism	1/95	57/8108	0.490409	0.813332	0.798515	9415	1
hsa04550	Signaling pathways regulating pluripotency of stem cells	2/95	143/8108	0.502223	0.813332	0.798515	5080/652	2
hsa04730	Long-term depression	1/95	60/8108	0.508238	0.813332	0.798515	3708	1
hsa04978	Mineral absorption	1/95	60/8108	0.508238	0.813332	0.798515	79901	1
hsa05416	Viral myocarditis	1/95	60/8108	0.508238	0.813332	0.798515	3117	1
hsa00590	Arachidonic acid metabolism	1/95	61/8108	0.514043	0.813332	0.798515	11283	1
hsa05171	Coronavirus disease - COVID-19	3/95	232/8108	0.514398	0.813332	0.798515	4312/3627/730	3
hsa04514	Cell adhesion molecules	2/95	149/8108	0.524272	0.813332	0.798515	3117/57502	2
hsa00310	Lysine degradation	1/95	63/8108	0.52545	0.813332	0.798515	2146	1
hsa04623	Cytosolic DNA-sensing pathway	1/95	63/8108	0.52545	0.813332	0.798515	3627	1
hsa05217	Basal cell carcinoma	1/95	63/8108	0.52545	0.813332	0.798515	652	1
hsa04261	Adrenergic signaling in cardiomyocytes	2/95	150/8108	0.527884	0.813332	0.798515	51806/776	2
hsa04934	Cushing syndrome	2/95	155/8108	0.545668	0.833239	0.818058	776/3708	2
hsa04390	Hippo signaling pathway	2/95	157/8108	0.552652	0.833239	0.818058	332/652	2
hsa00830	Retinol metabolism	1/95	68/8108	0.552822	0.833239	0.818058	125	1
hsa05204	Chemical carcinogenesis - DNA adducts	1/95	69/8108	0.558106	0.835151	0.819936	9	1
hsa04622	RIG-I-like receptor signaling pathway	1/95	70/8108	0.563328	0.836944	0.821696	3627	1
hsa05161	Hepatitis B	2/95	162/8108	0.569784	0.838854	0.823571	890/332	2
hsa05214	Glioma	1/95	75/8108	0.588536	0.838854	0.823571	51806	1
hsa04530	Tight junction	2/95	169/8108	0.592977	0.838854	0.823571	776/4629	2
hsa05133	Pertussis	1/95	76/8108	0.593402	0.838854	0.823571	51806	1
hsa05140	Leishmaniasis	1/95	77/8108	0.598211	0.838854	0.823571	3117	1
hsa05412	Arrhythmogenic right ventricular cardiomyopathy	1/95	77/8108	0.598211	0.838854	0.823571	776	1
hsa04151	PI3K-Akt signaling pathway	4/95	354/8108	0.600924	0.838854	0.823571	1311/5105/2066/1101	4
hsa00980	Metabolism of xenobiotics by cytochrome P450	1/95	78/8108	0.602964	0.838854	0.823571	125	1
hsa04612	Antigen processing and presentation	1/95	78/8108	0.602964	0.838854	0.823571	3117	1
hsa05020	Prion disease	3/95	273/8108	0.625569	0.838854	0.823571	776/3708/730	3
hsa05010	Alzheimer disease	4/95	369/8108	0.633943	0.838854	0.823571	51806/776/3708/4137	4
hsa04012	ErbB signaling pathway	1/95	85/8108	0.634711	0.838854	0.823571	2066	1
hsa04610	Complement and coagulation cascades	1/95	85/8108	0.634711	0.838854	0.823571	730	1
hsa04911	Insulin secretion	1/95	86/8108	0.639037	0.838854	0.823571	776	1
hsa05210	Colorectal cancer	1/95	86/8108	0.639037	0.838854	0.823571	332	1
hsa04621	NOD-like receptor signaling pathway	2/95	185/8108	0.642497	0.838854	0.823571	820/3708	2
hsa04260	Cardiac muscle contraction	1/95	87/8108	0.643311	0.838854	0.823571	776	1
hsa05034	Alcoholism	2/95	187/8108	0.648347	0.838854	0.823571	51806/4129	2
hsa04211	Longevity regulating pathway	1/95	89/8108	0.651711	0.838854	0.823571	9370	1
hsa04976	Bile secretion	1/95	89/8108	0.651711	0.838854	0.823571	366	1
hsa05410	Hypertrophic cardiomyopathy	1/95	90/8108	0.655837	0.838854	0.823571	776	1
hsa04613	Neutrophil extracellular trap formation	2/95	190/8108	0.656982	0.838854	0.823571	820/366	2
hsa05032	Morphine addiction	1/95	91/8108	0.659915	0.838854	0.823571	2568	1
hsa05022	Pathways of neurodegeneration - multiple diseases	5/95	476/8108	0.663079	0.838854	0.823571	51806/776/3708/4137/7802	5
hsa05167	Kaposi sarcoma-associated herpesvirus infection	2/95	194/8108	0.668234	0.838854	0.823571	51806/3708	2
hsa04350	TGF-beta signaling pathway	1/95	94/8108	0.671864	0.838854	0.823571	652	1
hsa05414	Dilated cardiomyopathy	1/95	96/8108	0.679598	0.838854	0.823571	776	1
hsa05215	Prostate cancer	1/95	97/8108	0.683397	0.838854	0.823571	7850	1
hsa05231	Choline metabolism in cancer	1/95	98/8108	0.687151	0.838854	0.823571	80736	1
hsa04510	Focal adhesion	2/95	201/8108	0.687215	0.838854	0.823571	1311/1101	2
hsa05205	Proteoglycans in cancer	2/95	205/8108	0.697662	0.838854	0.823571	3708/2066	2
hsa04916	Melanogenesis	1/95	101/8108	0.698152	0.838854	0.823571	51806	1
hsa04972	Pancreatic secretion	1/95	102/8108	0.701734	0.838854	0.823571	3708	1
hsa05146	Amoebiasis	1/95	102/8108	0.701734	0.838854	0.823571	7850	1
hsa04064	NF-kappa B signaling pathway	1/95	104/8108	0.708771	0.842424	0.827077	597	1
hsa04066	HIF-1 signaling pathway	1/95	109/8108	0.725652	0.854442	0.838875	5163	1
hsa04024	cAMP signaling pathway	2/95	219/8108	0.731998	0.854442	0.838875	51806/776	2
hsa04668	TNF signaling pathway	1/95	112/8108	0.735313	0.854442	0.838875	3627	1
hsa05145	Toxoplasmosis	1/95	112/8108	0.735313	0.854442	0.838875	3117	1
hsa05163	Human cytomegalovirus infection	2/95	225/8108	0.745683	0.861679	0.84598	51806/3708	2
hsa05165	Human papillomavirus infection	3/95	331/8108	0.751288	0.863359	0.84763	890/1311/1101	3
hsa04722	Neurotrophin signaling pathway	1/95	119/8108	0.756564	0.864645	0.848892	51806	1
hsa04919	Thyroid hormone signaling pathway	1/95	121/8108	0.76232	0.866462	0.850676	652	1
hsa04080	Neuroactive ligand-receptor interaction	3/95	341/8108	0.769207	0.866519	0.850732	10874/2568/2922	3
hsa04611	Platelet activation	1/95	124/8108	0.770702	0.866519	0.850732	3708	1
hsa04142	Lysosome	1/95	128/8108	0.781424	0.872072	0.856184	27074	1
hsa04926	Relaxin signaling pathway	1/95	129/8108	0.784026	0.872072	0.856184	4312	1
hsa04650	Natural killer cell mediated cytotoxicity	1/95	131/8108	0.789138	0.873089	0.857183	3002	1
hsa04140	Autophagy - animal	1/95	141/8108	0.812959	0.894685	0.878385	3708	1
hsa05017	Spinocerebellar ataxia	1/95	143/8108	0.817394	0.894831	0.878528	3708	1
hsa05224	Breast cancer	1/95	147/8108	0.825952	0.899467	0.88308	5241	1
